# Supplementary material for: Molecular Modeling Study of c-KIT/PDGFRα Dual Inhibitors for the Treatment of Gastrointestinal Stromal Tumors
Source: PubMed Central journal article supplement (PMC7662224; doi:10.3390/ijms21218232), 2020-11-03

## Supplementary Materials

### Molecular Modelling Study of c-KIT/PDGFR $\alpha$ Dual Inhibitors for the Treatment of Gastrointestinal Stromal Tumors

Seketoulie Keretsu<sup>1</sup>, Suparna Ghosh<sup>1</sup>, Seung Joo Cho<sup>1,2,\*</sup>

<sup>1</sup>*Department of Biomedical Sciences, College of Medicine, Chosun University, Gwangju 501-759, Republic of Korea; keretsu@chosun.kr(S.K); s.ghosh@chosun.kr (S.G); chosj@chosun.ac.kr (S.J.C)*

<sup>2</sup>*Department of Cellular Molecular Medicine, College of Medicine, Chosun University, Gwangju 501-759, Republic of Korea*

Table S1. The experimental/actual and predicted pIC<sub>50</sub> values with their residuals for the CoMFA and CoMSIA for c-KIT.

| Compound | Experimental pIC <sub>50</sub> | c-KIT CoMFA                 |          | c-KIT CoMSIA                |          |
|----------|--------------------------------|-----------------------------|----------|-----------------------------|----------|
|          |                                | Predicted pIC <sub>50</sub> | Residual | Predicted pIC <sub>50</sub> | Residual |
| 1        | 8.62                           | 8.27                        | -0.35    | 8.27                        | 0.35     |
| 2        | 8.43                           | 8.61                        | 0.17     | 9.10                        | -0.67    |
| 5        | 8.41                           | 8.58                        | 0.17     | 8.13                        | 0.28     |
| 6*       | 4.96                           | 5.80                        | 0.84     | 5.96                        | -0.99    |
| 7        | 5.74                           | 5.91                        | 0.17     | 6.73                        | -0.99    |
| 8        | 5.32                           | 5.26                        | -0.06    | 5.86                        | -0.54    |
| 9        | 5.62                           | 5.51                        | -0.11    | 5.51                        | 0.11     |
| 10*      | 6.70                           | 7.21                        | -0.52    | 7.33                        | -0.63    |
| 11       | 7.72                           | 7.62                        | -0.10    | 7.57                        | 0.15     |
| 12       | 5.71                           | 5.87                        | 0.16     | 5.88                        | -0.17    |
| 13       | 8.14                           | 8.16                        | 0.02     | 8.18                        | -0.04    |
| 14       | 8.62                           | 8.68                        | 0.06     | 8.27                        | 0.35     |
| 15*      | 5.65                           | 6.55                        | -0.90    | 6.60                        | -0.95    |
| 16       | 5.34                           | 5.17                        | -0.17    | 5.16                        | 0.18     |
| 17       | 6.40                           | 6.12                        | -0.28    | 6.07                        | 0.33     |
| 18       | 5.19                           | 5.50                        | 0.31     | 5.35                        | -0.16    |
| 19       | 7.92                           | 7.97                        | 0.05     | 8.26                        | -0.34    |
| 20*      | 7.92                           | 7.62                        | 0.30     | 8.90                        | -0.98    |
| 21       | 8.59                           | 8.71                        | 0.13     | 8.41                        | 0.17     |
| 22       | 8.03                           | 7.86                        | -0.17    | 7.78                        | 0.25     |
| 23*      | 4.66                           | 5.58                        | -0.93    | 5.60                        | -0.94    |
| 26       | 4.69                           | 4.73                        | 0.04     | 5.31                        | -0.62    |
| 27       | 8.46                           | 8.37                        | -0.09    | 8.51                        | -0.05    |
| 28*      | 8.85                           | 8.09                        | 0.77     | 8.44                        | 0.42     |
| 29       | 6.49                           | 6.41                        | -0.08    | 5.88                        | 0.62     |
| 30       | 5.85                           | 6.10                        | 0.25     | 5.82                        | 0.03     |
| 31       | 6.26                           | 6.18                        | -0.08    | 5.93                        | 0.32     |
| 32*      | 6.50                           | 6.46                        | 0.03     | 6.30                        | 0.20     |

|     |      |      |       |      |       |
|-----|------|------|-------|------|-------|
| 33  | 6.84 | 6.94 | 0.10  | 7.08 | -0.24 |
| 35* | 7.29 | 8.10 | -0.81 | 7.92 | -0.62 |
| 36  | 7.59 | 7.48 | -0.10 | 7.45 | 0.14  |
| 37* | 7.11 | 6.11 | 1.00  | 6.47 | 0.64  |
| 39  | 8.43 | 8.57 | 0.14  | 8.37 | 0.06  |
| 40  | 8.77 | 9.02 | 0.25  | 8.88 | -0.11 |
| 41  | 8.21 | 8.32 | 0.11  | 8.71 | -0.51 |
| 42* | 8.06 | 8.91 | -0.85 | 8.68 | -0.62 |
| 43  | 6.92 | 6.98 | 0.06  | 7.15 | -0.23 |
| 44  | 7.70 | 7.75 | 0.05  | 7.75 | -0.05 |
| 45* | 7.85 | 6.92 | 0.94  | 7.62 | 0.23  |
| 46  | 8.72 | 8.37 | -0.35 | 8.45 | 0.28  |
| 47* | 7.70 | 8.42 | -0.72 | 8.49 | -0.79 |
| 48  | 8.44 | 8.14 | -0.30 | 7.52 | 0.92  |

\* Test set compounds

Table S2. The experimental/actual and predicted pIC<sub>50</sub> values with their residuals for the CoMFA and CoMSIA for PDGFR $\alpha$ .

| Compound | Experimental pIC <sub>50</sub> | PDGFR $\alpha$ CoMFA        |          | PDGFR $\alpha$ CoMSIA       |          |
|----------|--------------------------------|-----------------------------|----------|-----------------------------|----------|
|          |                                | Predicted pIC <sub>50</sub> | Residual | Predicted pIC <sub>50</sub> | Residual |
| 1        | 7.06                           | 7.14                        | -0.08    | 7.32                        | -0.26    |
| 2        | 7.49                           | 7.49                        | 0.01     | 7.45                        | 0.04     |
| 5        | 7.66                           | 7.54                        | 0.12     | 7.23                        | 0.43     |
| 6*       | 6.52                           | 6.11                        | 0.40     | 6.78                        | -0.27    |
| 7        | 7.19                           | 6.98                        | 0.21     | 6.99                        | 0.20     |
| 8        | 6.58                           | 6.55                        | 0.03     | 6.81                        | -0.22    |
| 9        | 6.74                           | 6.87                        | -0.13    | 7.05                        | -0.31    |
| 10*      | 4.67                           | 3.85                        | 0.82     | 5.56                        | -0.89    |
| 11       | 6.67                           | 6.70                        | -0.03    | 6.57                        | 0.09     |
| 12       | 5.75                           | 5.57                        | 0.18     | 5.25                        | 0.50     |
| 13       | 6.90                           | 7.00                        | -0.11    | 6.96                        | -0.06    |
| 14       | 8.14                           | 7.98                        | 0.16     | 7.96                        | 0.18     |
| 15*      | 5.96                           | 6.34                        | -0.38    | 6.65                        | -0.69    |
| 16       | 6.03                           | 6.25                        | -0.22    | 5.50                        | 0.53     |
| 17       | 4.72                           | 4.66                        | 0.06     | 5.30                        | -0.57    |
| 18       | 5.39                           | 5.35                        | 0.04     | 5.56                        | -0.17    |
| 19       | 6.87                           | 6.89                        | -0.03    | 7.05                        | -0.19    |
| 20*      | 6.75                           | 6.81                        | -0.06    | 7.04                        | -0.29    |
| 21       | 7.08                           | 7.04                        | 0.04     | 6.97                        | 0.11     |
| 22       | 6.51                           | 6.54                        | -0.03    | 6.86                        | -0.35    |
| 23*      | 5.34                           | 5.99                        | -0.66    | 6.17                        | -0.83    |
| 26       | 4.36                           | 4.33                        | 0.03     | 4.59                        | -0.23    |
| 27       | 6.79                           | 6.86                        | -0.07    | 6.80                        | -0.01    |
| 28*      | 7.57                           | 6.94                        | 0.63     | 6.90                        | 0.67     |
| 29       | 5.95                           | 5.96                        | -0.01    | 5.78                        | 0.17     |
| 30       | 5.83                           | 6.09                        | -0.25    | 5.90                        | -0.07    |
| 31       | 5.95                           | 5.91                        | 0.04     | 6.00                        | -0.06    |

|            |      |      |       |      |       |
|------------|------|------|-------|------|-------|
| <b>32*</b> | 6.14 | 5.88 | 0.26  | 5.80 | 0.34  |
| <b>33</b>  | 6.24 | 6.20 | 0.04  | 5.73 | 0.51  |
| <b>35*</b> | 6.41 | 6.88 | -0.46 | 6.18 | 0.23  |
| <b>36</b>  | 6.80 | 6.80 | 0.00  | 6.47 | 0.34  |
| <b>37*</b> | 6.33 | 6.86 | -0.53 | 6.27 | 0.05  |
| <b>39</b>  | 7.09 | 7.08 | 0.01  | 7.45 | -0.36 |
| <b>40</b>  | 7.62 | 7.66 | -0.04 | 7.33 | 0.29  |
| <b>41</b>  | 6.87 | 7.05 | -0.18 | 6.90 | -0.03 |
| <b>42*</b> | 7.08 | 7.54 | -0.46 | 6.97 | 0.11  |
| <b>43</b>  | 6.39 | 6.29 | 0.10  | 6.16 | 0.23  |
| <b>44</b>  | 6.40 | 6.41 | -0.01 | 6.43 | -0.03 |
| <b>45*</b> | 6.50 | 6.29 | 0.22  | 6.03 | 0.47  |
| <b>46</b>  | 7.66 | 7.57 | 0.09  | 7.50 | 0.16  |
| <b>47*</b> | 6.91 | 6.21 | 0.70  | 6.61 | 0.30  |
| <b>48</b>  | 7.01 | 6.99 | 0.03  | 6.43 | 0.58  |

\* Test set compounds

**Table S3:** The predicted ADMET values and synthetic accessibility values for the 8 designed compounds.

| Compounds  | Absorption                    | Distribution             | Metabolism           |     |     |      |     |     |     | Excretion               | Toxicity             | Synthetic Accessibility |
|------------|-------------------------------|--------------------------|----------------------|-----|-----|------|-----|-----|-----|-------------------------|----------------------|-------------------------|
|            | Intestinal absorption (human) | VD <sub>ss</sub> (human) | CYP                  |     |     |      |     |     |     | Total Clearance         | AMES toxicity        |                         |
|            |                               |                          | 2D6                  | 3A4 | 1A2 | 2C19 | 2C9 | 2D6 | 3A4 |                         |                      |                         |
|            | Numeric (% Absorbed)          | Numeric (log L/kg)       | Categorical (Yes/No) |     |     |      |     |     |     | Numeric (log ml/min/kg) | Categorical (Yes/No) |                         |
|            |                               | substrate                | inhibitor            |     |     |      |     |     |     |                         |                      |                         |
| <b>D18</b> | 89                            | 0.2                      | Yes                  | Yes | No  | Yes  | Yes | No  | Yes | 0.9                     | No                   | 3.8                     |
| <b>D23</b> | 98                            | -0.5                     | Yes                  | Yes | Yes | Yes  | No  | Yes | No  | 0.8                     | No                   | 4.4                     |
| <b>D25</b> | 87                            | -0.4                     | Yes                  | Yes | No  | No   | No  | No  | No  | 0.8                     | No                   | 4.0                     |
| <b>D28</b> | 92                            | -0.7                     | Yes                  | Yes | Yes | Yes  | Yes | No  | Yes | 0.8                     | No                   | 3.9                     |
| <b>D32</b> | 93                            | -0.8                     | Yes                  | Yes | Yes | Yes  | Yes | No  | No  | 0.6                     | No                   | 3.8                     |
| <b>D39</b> | 88                            | -1.2                     | Yes                  | Yes | Yes | Yes  | No  | No  | No  | 0.5                     | Yes                  | 3.5                     |
| <b>D44</b> | 87                            | 0.1                      | Yes                  | Yes | Yes | Yes  | Yes | No  | No  | 0.8                     | No                   | 3.5                     |
| <b>D45</b> | 86                            | 0.2                      | Yes                  | Yes | Yes | Yes  | Yes | No  | Yes | 0.9                     | No                   | 3.6                     |

**Figure S1.** Showing the H-bond interactions of **imatinib** and **compound 14** with c-KIT and PDGFR $\alpha$  from the molecular docking studies. H-bond interactions were represented by yellow dotted lines and residues forming H-bonds were shown in purple color. **(a)** Binding interactions between imatinib (green) and c-KIT. The overlap between the docked pose (green) and the crystal ligand (salmon) is shown in inset **(b)** Binding interactions between imatinib (magenta) and PDGFR $\alpha$ . The overlap between the docked pose (magenta) and the crystal ligand (salmon) is shown in inset **(c)** Binding interactions between compound 14 (cyan) and c-KIT. **(d)** Binding interactions between compound 14 (yellow) and PDGFR $\alpha$ .

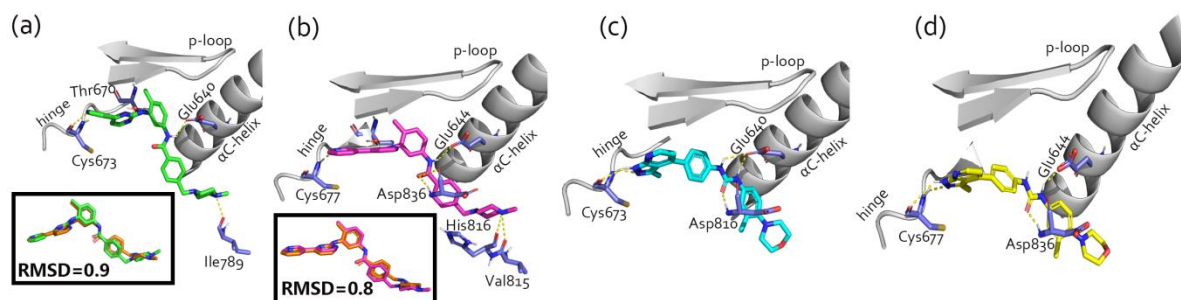

**Figure S2.** Showing the hydrophobic interactions of the inhibitors with c-KIT and PDGFR $\alpha$ . Hydrophobic interactions were represented in red dotted lines. Residues that showed Hydrophobic and H-bond interactions were given in green and black label respectively. **(a) Compound 14-c-KIT (b) Compound 31-c-KIT (c) D39-c-KIT (d) compound D39-PDGFR $\alpha$ .**

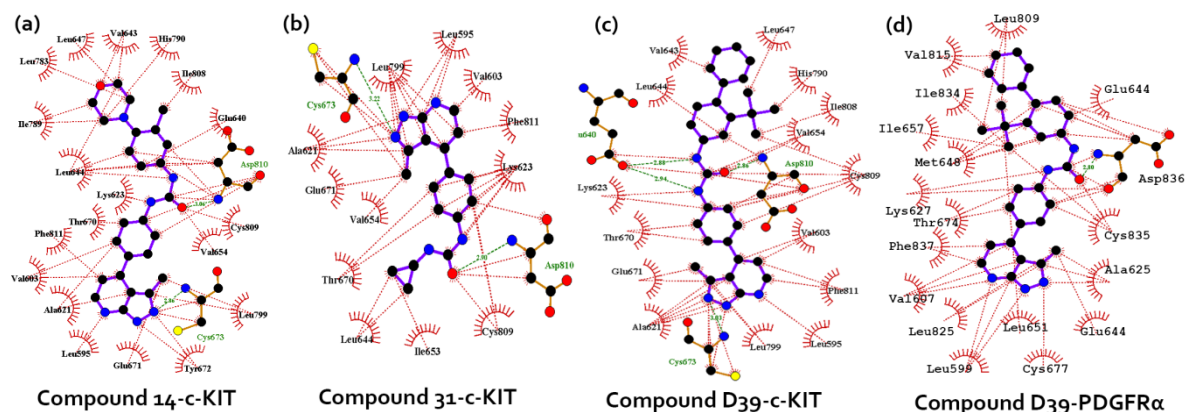

**Figure S3.** Scatter plot for the CoMFA and CoMSIA models. Scatter plot for (a) c-KIT CoMFA model (b) c-KIT CoMSIA model (c) PDGFR $\alpha$  CoMFA model (d) PDGFR $\alpha$  CoMSIA model. The values on the x-axis and y-axis represent the predicted pIC<sub>50</sub> values and the experimental/actual pIC<sub>50</sub> values respectively.

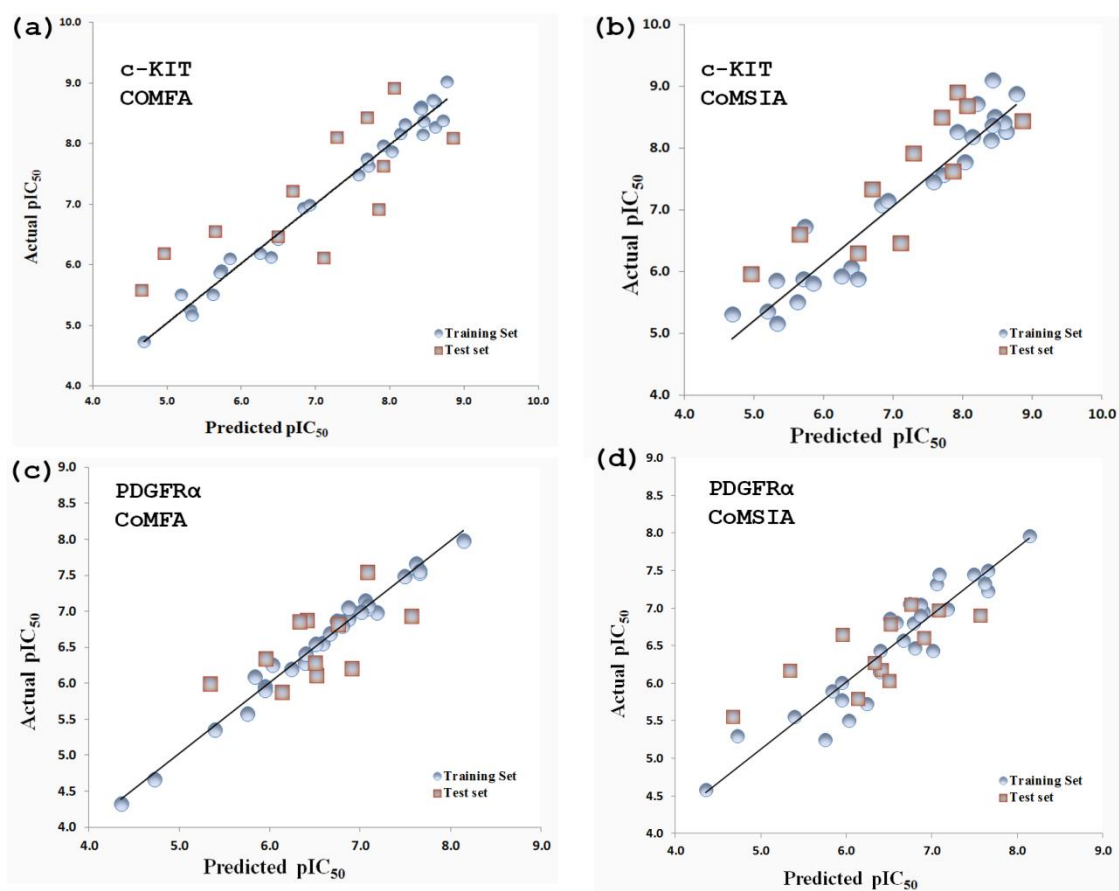

**Figure S4.** The ligand RMSD plots from the MD simulations. (a) Imatinib-c-KIT (b) Compound 14-c-KIT (c) Compound 31-c-KIT (d) D18-c-KIT (e) D23-c-KIT (f) D25-c-KIT (g) D28-c-KIT (h) D32-c-KIT (i) D39-c-KIT (j) D44-c-KIT (k) D45-c-KIT (l) Imatinib-c-KIT/T670I (m) Imatinib-PDGFR $\alpha$  (n) Compound 14- PDGFR $\alpha$  (o) Compound 31- PDGFR $\alpha$  (p) D18-PDGFR $\alpha$  (q) D23-PDGFR $\alpha$  (r) D25-PDGFR $\alpha$  (s) D28-PDGFR $\alpha$  (t) D32-PDGFR $\alpha$  (u) D39-PDGFR $\alpha$  (v) D44-PDGFR $\alpha$  (w) D45-PDGFR $\alpha$  (x) Imatinib-PDGFR $\alpha$ /T674I (y) Compound 14-c-KIT $\alpha$ /T670I (z) Compound 14- PDGFR $\alpha$ /T674I

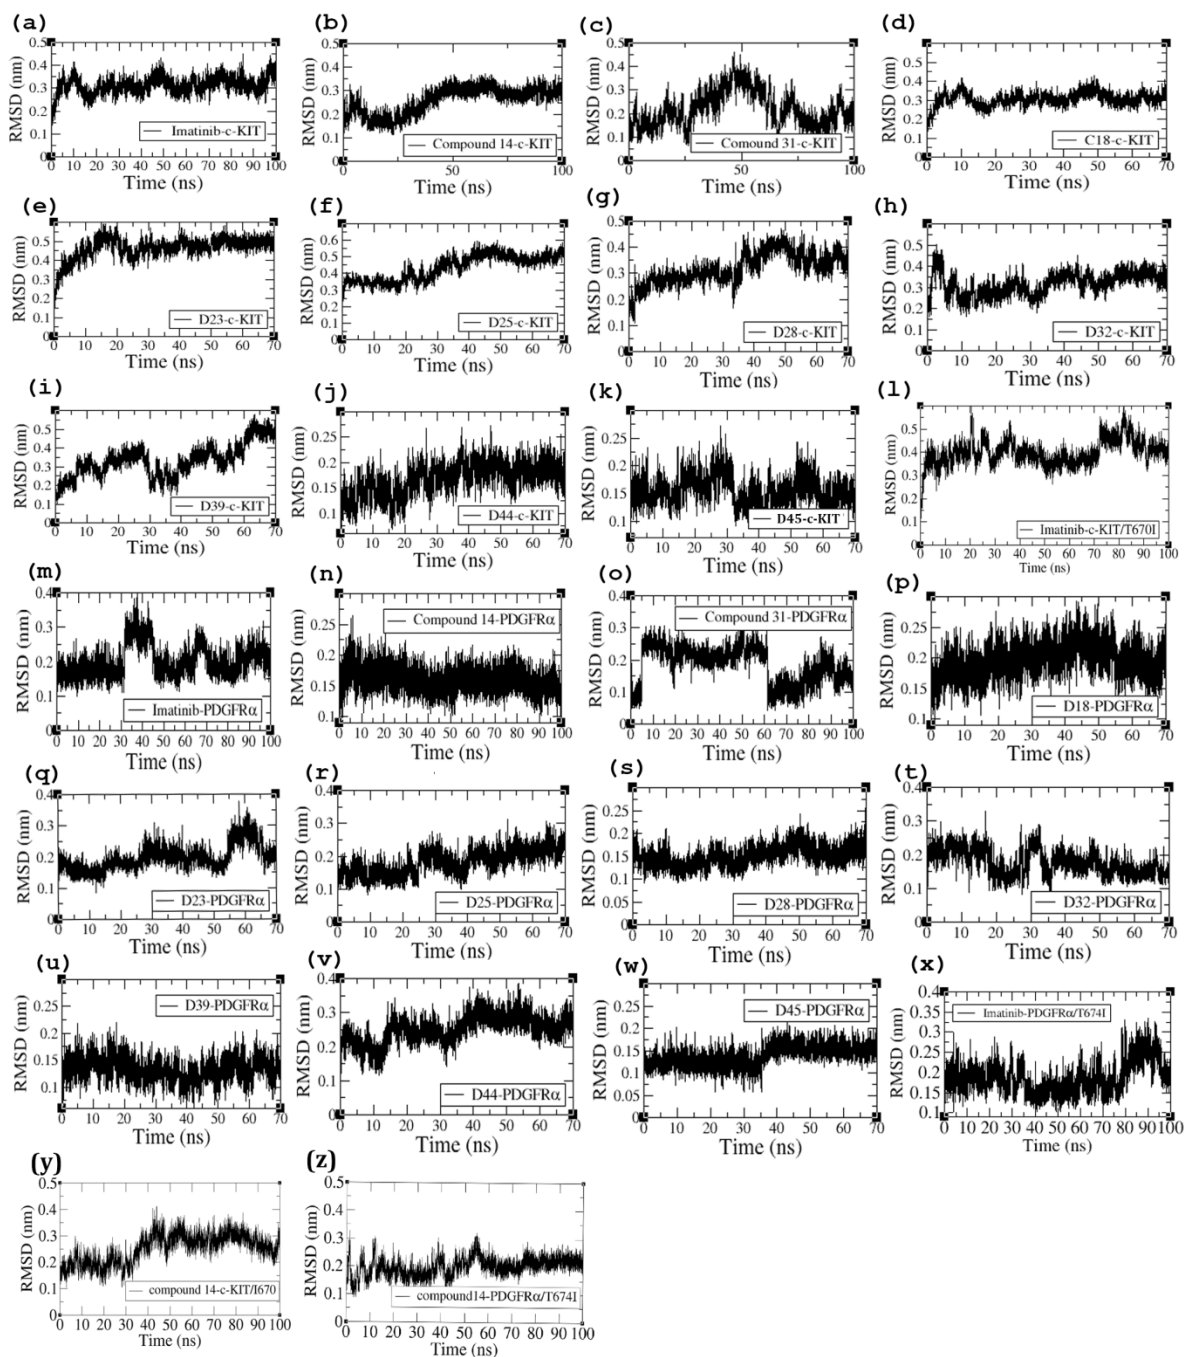

**Figure S5.** Hydrophobic surface of c-KIT and the binding interactions of compound 31 with the receptors. (a) The hydrophobic surface of the c-KIT binding site residues; Hydrophobic residues from the  $\alpha$ C-helix and the catalytic loops are shown in stick representation (b) Binding interactions between **compound 31** and c-KIT. (c) Binding interactions between **compound 31** and PDGFR $\alpha$ .

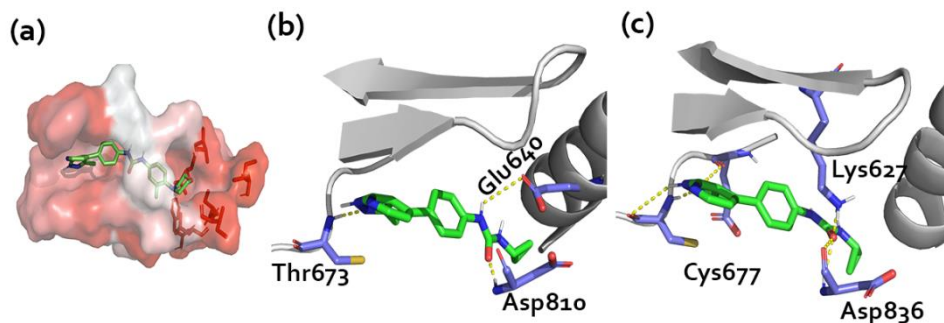

Supplement: ijms-21-08232-s001.pdf [file ijms-21-08232-s001.pdf]
